# Supplementary material for: Zinc Acetate Lozenges May Improve the Recovery Rate of Common Cold Patients: An Individual Patient Data Meta-Analysis
Source: PubMed Central journal article supplement — Open Forum Infect Dis. 2017 Apr 3;4(2):ofx059. doi: 10.1093/ofid/ofx059 (PMC5410113; doi:10.1093/ofid/ofx059), 2017-04-03
Supplement: ofx059_suppl_supplementaryfile_2.pdf [file ofx059_suppl_supplementaryfile_2.pdf]

# Zinc acetate lozenges may improve the recovery rate of common cold patients: an IPD meta-analysis

## Supplementary File 2

This is supplementary material to a paper by Hemilä et al. (2017).

<https://doi.org/10.1093/ofid/ofx059>

Open Forum Infectious Diseases:

<https://academic.oup.com/ofid>

### Harri Hemilä

Department of Public Health,

University of Helsinki,

Helsinki, FIN-00014 Finland

[harri.hemila@helsinki.fi](mailto:harri.hemila@helsinki.fi)

<http://www.mv.helsinki.fi/home/hemila/>

<http://www.mv.helsinki.fi/home/hemila/Zinc.htm> (papers on zinc and the common cold)

April 20, 2017

Statistical analyses of the studies are described in this file.

The data set used in the study is printed at the end of this file.

### This file contains:

#### Page

- 2 **Table 2 analyses:**
- 2 Effect of zinc acetate lozenges on the recovery rate from the common cold  
The 3 trials individually
- 5 Effect of zinc acetate lozenges on the recovery from the common cold
- 5 Cox model; mixed effects pooling, study as a random effect for zinc efficacy
- 6 Cox model; pooling stratified by study
- 7 Cox model; pooling ignoring study as a clustering variable
- 8 Kaplan-Meier estimates for the pooled data of the 3 trials
- 9 **Table 3 analyses**
- 10 Effect zinc acetate lozenges, effect modification by sex as an example
- 12 Effect zinc acetate lozenges, effect modification by age as a continuous variable
- 13 **Table S1.** Difference in zinc acetate lozenge efficacy between subgroups:  
Calculation of the ratio of RRs between the subgroups (RRR).
- 14 **Table S2.** Effect of zinc lozenges on recovery rate by age subgroups within the 3 trials
- 15 **Three zinc gluconate lozenge trials:**
- 16 Calculation of RR and NNT for the Eby (1984) and Mossad (1996) trials
- 18 Kaplan-Meier curves for the Eby (1984) and Mossad (1996) trials
- 19 Calculation of RR and NNT for day 7 of the Godfrey (1992) trial
- 20 **The data set** that was analyzed in the study

**Table 2 analyses:** Effect of zinc acetate lozenges on the recovery rate from the common cold

**Petrus (1998)**

```
> PetrusCox <- coxph(PetrusSurv ~ Petrus_1998$Zinc , method = "efron")
```

```
> PetrusCox
```

```
Call:
```

```
coxph(formula = PetrusSurv ~ Petrus_1998$Zinc, method = "efron")
```

```
                coef exp(coef) se(coef)      z      p
Petrus_1998$Zinc 0.573      1.774    0.214 2.68 0.0073
```

```
Likelihood ratio test=7.3 on 1 df, p=0.00691
```

```
n= 101, number of events= 101
```

```
> exp(confint(PetrusCox))
```

```
                2.5 % 97.5 %
Petrus_1998$Zinc 1.167  2.696
```

**Test for constant RR assumption**

```
> cox.zph(PetrusCox)
```

```
                rho chisq      p
Petrus_1998$Zinc 0.0619 0.415 0.519
```

the cox.zph procedure is described on p 22-23 of

<https://cran.r-project.org/web/packages/survival/survival.pdf>

If  $p > 0.05$ , then the data are consistent with constant RR assumption.

Thus, the above  $p = 0.519$  indicates that the constant RR assumption is appropriate.

## Prasad (2000)

```
> Prasad_2000Cox <- coxph(Prasad_2000Surv ~ Prasad_2000$Zinc , method = "efron")
> Prasad_2000Cox
Call:
coxph(formula = Prasad_2000Surv ~ Prasad_2000$Zinc, method = "efron")
```

|                   | coef  | exp(coef) | se(coef) | z    | p       |
|-------------------|-------|-----------|----------|------|---------|
| Prasad_2000\$Zinc | 2.017 | 7.519     | 0.381    | 5.29 | 1.2e-07 |

Likelihood ratio test=30.2 on 1 df, p=3.99e-08

n= 48, number of events= 48

```
> exp(confint(Prasad_2000Cox))
```

|                   | 2.5 % | 97.5 % |
|-------------------|-------|--------|
| Prasad_2000\$Zinc | 3.56  | 15.9   |

**Test for constant RR assumption, see p. 2.**

```
> cox.zph(Prasad_2000Cox)
```

|                   | rho    | chisq | p     |
|-------------------|--------|-------|-------|
| Prasad_2000\$Zinc | -0.177 | 1.19  | 0.275 |

## Prasad (2008)

```
> Prasad_2008Cox <- coxph(Prasad_2008Surv ~ Prasad_2008$Zinc , method = "efron")
> Prasad_2008Cox
Call:
```

```
coxph(formula = Prasad_2008Surv ~ Prasad_2008$Zinc, method = "efron")
      coef exp(coef) se(coef)      z      p
Prasad_2008$Zinc  3.100    22.201    0.539  5.75 8.7e-09
```

```
Likelihood ratio test=46.6 on 1 df, p=8.57e-12
n= 50, number of events= 50
```

```
> exp(confint(Prasad_2008Cox))
      2.5 % 97.5 %
Prasad_2008$Zinc  7.72  63.8
```

**Test for constant RR assumption, see p. 2.**

```
> cox.zph(Prasad_2008Cox)
      rho chisq      p
Prasad_2008$Zinc -0.0635 0.163 0.686
```

**Table 2 analyses:** Effect of zinc acetate lozenges on the recovery rate from the common cold

**Cox model; mixed effects pooling, study as a random effect for zinc efficacy**

```
> zIPDme <- coxme(zincIPDsurv ~ Study + Zinc + (Zinc-1|Study), ties = "efron")
> zIPDme
Cox mixed-effects model fit by maximum likelihood

  events, n = 199, 199
  Iterations= 5 23
              NULL Integrated Fitted
Log-likelihood -858          -833   -831

              Chisq df          p AIC BIC
Integrated loglik  50.4 4.0 2.99e-10 42.4 29.2
Penalized loglik  54.2 3.8 3.54e-11 46.6 34.1

Model: zincIPDsurv ~ Study + Zinc + (Zinc - 1 | Study)
Fixed coefficients
      coef exp(coef) se(coef)      z      p
StudyP2000 0.0944      1.10  0.221 0.43 6.7e-01
StudyP2008 0.4510      1.57  0.222 2.04 4.2e-02
Zinc       1.1459      3.15  0.205 5.59 2.3e-08

Random effects
  Group Variable Std Dev Variance
  Study Zinc      0.2185  0.0478
> confint_zIPDme<-c(1.1459-1.96*0.205, 1.1459+1.96*0.205)
> exp(confint_zIPDme)
[1] 2.1 4.7
```

The above statistical model is based on the instructions by Stewart et al (2012) in PLOS One: <http://dx.doi.org/10.1371/journal.pone.0046042>  
Supplementary file of that paper describes the appropriate model in the R-code. <http://dx.doi.org/10.1371/journal.pone.0046042.s003>

The first page of the supplementary file, Model 1 shows the code for “One-stage random-effects model:

Here treatment effect varies across trials, distributed normally around the overall effect  $\theta$ , with heterogeneity  $\tau^2$ .”

“R code: `glmer(event~trial+treat+(treatn-1|trial), family= binomial)`”

Thus, Study(=trial) is included in our model as a random effect for zinc effect in the last term, but Study is also included as a variable alone as the first term.

Adding Study as a random variable for the zinc effect means that variation in the true zinc effect is allowed between the Studies.

Adding Study as an independent explanatory variable means that the Studies may have different baseline risks.

In our case the R-program is different (not “glmer”), but the structure of the model is the same.

## Table 2 analyses

### Cox model; pooling stratified by study

```
> zStrata <- coxph(zincIPDsurv ~ zincIPD$Zinc + strata(zincIPD$Study), method = "efron")
```

```
> zStrata
```

```
Call:
```

```
coxph(formula = zincIPDsurv ~ zincIPD$Zinc + strata(zincIPD$Study),  
      method = "efron")
```

|               | coef  | exp(coef) | se(coef) | z    | p       |
|---------------|-------|-----------|----------|------|---------|
| zincIPD\$Zinc | 1.274 | 3.575     | 0.178    | 7.17 | 7.4e-13 |

Likelihood ratio test=55.4 on 1 df, p=1.01e-13

n= 199, number of events= 199

```
> exp(confint(zStrata))
```

|               | 2.5 % | 97.5 % |
|---------------|-------|--------|
| zincIPD\$Zinc | 2.52  | 5.06   |

## Table 2 analyses

### Cox model; pooling ignoring study as a clustering variable

```
> zIPDCox <- coxph(zincIPDsurv ~ Zinc, method = "efron")
> zIPDCox
Call:
coxph(formula = zincIPDsurv ~ Zinc, method = "efron")
```

```
      coef exp(coef) se(coef)  z      p
Zinc 0.948    2.580    0.150 6.3 3e-10
```

Likelihood ratio test=39.3 on 1 df, p=3.58e-10  
n= 199, number of events= 199

```
> exp(confint(zIPDCox))
      2.5 % 97.5 %
Zinc  1.92  3.47
```

In pooling ignoring the study as a clustering variable, the constant RR assumption was assessed by calculating the RR for each day.

All the single day RR confidence intervals are consistent with the above overall estimate RR = 2.58.

| Day | Placebo        |               |       | Zinc           |               |       | Rate Ratio (RR) | 95%CI |      |
|-----|----------------|---------------|-------|----------------|---------------|-------|-----------------|-------|------|
|     | Number at risk | Number events | Rate  | Number at risk | Number events | Rate  |                 | Low   | High |
| 2   | 97             | 3             | 0.031 | 102            | 10            | 0.098 | 3.17            | 0.81  | 17.9 |
| 3   | 94             | 3             | 0.032 | 92             | 23            | 0.250 | 7.83            | 2.37  | 40.7 |
| 4   | 91             | 10            | 0.110 | 69             | 21            | 0.304 | 2.77            | 1.25  | 6.59 |
| 5   | 81             | 10            | 0.123 | 48             | 17            | 0.354 | 2.87            | 1.24  | 7.01 |
| 6   | 71             | 12            | 0.169 | 31             | 12            | 0.387 | 2.29            | 0.94  | 5.6  |
| 7   | 59             | 21            | 0.356 | 19             | 8             | 0.421 | 1.18            | 0.45  | 2.8  |
| 8   | 38             | 14            | 0.368 | 11             | 6             | 0.545 | 1.48            | 0.46  | 4.1  |
| 9   | 24             | 8             | 0.333 | 5              | 1             | 0.200 | 0.60            | 0.01  | 4.5  |
| 10  | 16             | 3             | 0.188 | 4              | 1             | 0.250 | 1.33            | 0.02  | 16.6 |

**Kaplan-Meier estimates for the pooled data of the 3 trials**

```
> KM_zincIPD <- survfit(zincIPDsurv ~ zincIPD$Zinc)
> summary(KM_zincIPD)
Call: survfit(formula = zincIPDsurv ~ zincIPD$Zinc)
```

zincIPD\$Zinc=0

| time | n.risk | n.event | survival | std.err | lower 95% CI | upper 95% CI |
|------|--------|---------|----------|---------|--------------|--------------|
| 2    | 97     | 3       | 0.9691   | 0.0176  | 0.9352       | 1.000        |
| 3    | 94     | 3       | 0.9381   | 0.0245  | 0.8914       | 0.987        |
| 4    | 91     | 10      | 0.8351   | 0.0377  | 0.7644       | 0.912        |
| 5    | 81     | 10      | 0.7320   | 0.0450  | 0.6489       | 0.826        |
| 6    | 71     | 12      | 0.6082   | 0.0496  | 0.5185       | 0.714        |
| 7    | 59     | 21      | 0.3918   | 0.0496  | 0.3057       | 0.502        |
| 8    | 38     | 14      | 0.2474   | 0.0438  | 0.1749       | 0.350        |
| 9    | 24     | 8       | 0.1649   | 0.0377  | 0.1054       | 0.258        |
| 10   | 16     | 3       | 0.1340   | 0.0346  | 0.0808       | 0.222        |
| 11   | 13     | 2       | 0.1134   | 0.0322  | 0.0650       | 0.198        |
| 12   | 11     | 3       | 0.0825   | 0.0279  | 0.0425       | 0.160        |
| 13   | 8      | 2       | 0.0619   | 0.0245  | 0.0285       | 0.134        |
| 14   | 6      | 2       | 0.0412   | 0.0202  | 0.0158       | 0.108        |
| 15   | 4      | 4       | 0.0000   | NaN     | NA           | NA           |

zincIPD\$Zinc=1

| time | n.risk | n.event | survival | std.err | lower 95% CI | upper 95% CI |
|------|--------|---------|----------|---------|--------------|--------------|
| 2    | 102    | 10      | 0.9020   | 0.02944 | 0.84606      | 0.9616       |
| 3    | 92     | 23      | 0.6765   | 0.04632 | 0.59151      | 0.7736       |
| 4    | 69     | 21      | 0.4706   | 0.04942 | 0.38304      | 0.5781       |
| 5    | 48     | 17      | 0.3039   | 0.04554 | 0.22657      | 0.4077       |
| 6    | 31     | 12      | 0.1863   | 0.03855 | 0.12416      | 0.2795       |
| 7    | 19     | 8       | 0.1078   | 0.03071 | 0.06171      | 0.1885       |
| 8    | 11     | 6       | 0.0490   | 0.02138 | 0.02085      | 0.1152       |
| 9    | 5      | 1       | 0.0392   | 0.01922 | 0.01501      | 0.1025       |
| 10   | 4      | 1       | 0.0294   | 0.01673 | 0.00965      | 0.0897       |
| 11   | 3      | 2       | 0.0098   | 0.00976 | 0.00139      | 0.0689       |
| 12   | 1      | 1       | 0.0000   | NaN     | NA           | NA           |



### Table 3 analyses

The statistical model for treatment-subgroup interaction on the following pages are based on the instructions by Stewart et al (2012) in PLOS One:

<http://dx.doi.org/10.1371/journal.pone.0046042>

Supplementary file of that paper describes the appropriate model in the R-code.

<http://dx.doi.org/10.1371/journal.pone.0046042.s003>

The first page of the supplementary file, Model 4 shows the code for

“One-stage random-effects model with treatment-covariate interaction (Simmonds (2005)):

This model allows for independent effects of the covariate on risk across trials”

“R code: `glmer(event~trial*covar+treat*covar+(treatn-1|trial), family= binomial)`”

In our case the “`trials*covar`” term corresponds to the “`study*subgroup`” term, so that “subgroup” is sex, age, etc.

The subgroup may have different own effects on the rate of recovery and those own effects may vary between studies. Adding the “`study*subgroup`” term to the above model allows the program to adjust for variations between the studies.

The next two pages show the modification of zinc effect by sex as an example.

Other tests of zinc effect modification are similar.

Age-zinc interaction was analyzed also as a continuous variable (p. 11),

and it was analyzed also within the 3 trials by dichotomizing by the median level (Table S2, p. 13).

### Table 3 analyses: Effect of zinc acetate lozenges, effect modification by sex as an example

Zinc effect RR = 3.613 below indicates the effect of zinc lozenges on males

Interaction RRR = 0.816 below indicates the ratio between the RR for males and the RR for females

Zinc effect RR = 2.948 on females is calculated on the next page, p. 10.

Thus  $RRR = 0.816 = 2.948/3.613$

The RRR indicates the ratio of two complementary RRs. If there is no difference in the effect in the two subgroups,  $RRR = 1.00$ .

All the RRR values for subgroup comparisons are shown on p. 12.

```
> zmeSex <- coxme(zincIPDsurv ~ Study*Sex + Zinc+Sex + (Zinc-1|Study), ties = "efron")
> zmeSexI <- coxme(zincIPDsurv ~ Study*Sex + Zinc*Sex + (Zinc-1|Study), ties = "efron")
> zmeSexI
```

Cox mixed-effects model fit by maximum likelihood

```
events, n = 199, 199
Iterations= 23 118
              NULL Integrated Fitted
Log-likelihood -858      -832    -830

              Chisq  df      p  AIC  BIC
Integrated loglik  51.1 8.00 2.50e-08 35.1  8.76
Penalized loglik  55.6 7.92 3.15e-09 39.7 13.64
```

Model: zincIPDsurv ~ Study \* Sex + Zinc \* Sex + (Zinc - 1 | Study)

Fixed coefficients

|                | coef   | exp(coef)    | se(coef) | z     | p       |
|----------------|--------|--------------|----------|-------|---------|
| StudyP2000     | 0.172  | 1.187        | 0.309    | 0.56  | 5.8e-01 |
| StudyP2008     | 0.504  | 1.656        | 0.317    | 1.59  | 1.1e-01 |
| Sex            | 0.205  | 1.227        | 0.259    | 0.79  | 4.3e-01 |
| Zinc           | 1.285  | <b>3.613</b> | 0.284    | 4.53  | 6.0e-06 |
| StudyP2000:Sex | -0.180 | 0.836        | 0.365    | -0.49 | 6.2e-01 |
| StudyP2008:Sex | -0.147 | 0.864        | 0.363    | -0.40 | 6.9e-01 |
| Sex:Zinc       | -0.203 | <b>0.816</b> | 0.294    | -0.69 | 4.9e-01 |

Random effects

```
Group Variable Std Dev Variance
Study Zinc      0.2508  0.0629
```

```
> anova(zmeSex,zmeSexI)
```

Analysis of Deviance Table

Cox model: response is zincIPDsurv

Model 1: ~Study \* Sex + Zinc + Sex + (Zinc - 1 | Study)

Model 2: ~Study \* Sex + Zinc \* Sex + (Zinc - 1 | Study)

```
loglik Chisq Df P(>|Chi|)
```

```
1 -833
```

```
2 -832 0.47 1 0.49
```

```
> confint_zmeAgI<-c(-0.203-1.96*0.294, -0.203+1.96*0.294)
```

```
> exp(confint_zmeAgI)
```

```
[1] 0.459 1.452
```

### Table 3 analyses: Effect of zinc acetate lozenges, effect modification by sex as an example

Compare with the previous sheet

Zinc effect RR = 2.948 below indicates the effect of zinc lozenges on females

Interaction RRR = 1.225 below indicates the ratio between the RR for females and the RR for males

Zinc effect RR = 3.613 on males is calculated on the previous page

Thus, RRR = 1.225 indicates the ratio 3.613/2.948

```
> zmeWoman <- coxme(zincIPDsurv ~ Study*Woman + Zinc+Woman + (Zinc-1|Study), ties = "efron")
> zmeWomanI <- coxme(zincIPDsurv ~ Study*Woman + Zinc*Woman + (Zinc-1|Study), ties = "efron")
> zmeWomanI
```

Cox mixed-effects model fit by maximum likelihood

```
events, n = 199, 199
Iterations= 24 123
          NULL Integrated Fitted
Log-likelihood -858      -832    -830

          Chisq  df      p  AIC  BIC
Integrated loglik  51.1 8.00 2.50e-08 35.1  8.76
Penalized loglik  55.6 7.92 3.15e-09 39.7 13.64
```

Model: zincIPDsurv ~ Study \* Woman + Zinc \* Woman + (Zinc - 1 | Study)

Fixed coefficients

|                  | coef     | exp(coef) | se(coef) | z     | p       |
|------------------|----------|-----------|----------|-------|---------|
| StudyP2000       | -0.00804 | 0.992     | 0.274    | -0.03 | 9.8e-01 |
| StudyP2008       | 0.35751  | 1.430     | 0.268    | 1.34  | 1.8e-01 |
| Woman            | -0.20492 | 0.815     | 0.259    | -0.79 | 4.3e-01 |
| Zinc             | 1.08124  | 2.948     | 0.246    | 4.40  | 1.1e-05 |
| StudyP2000:Woman | 0.17966  | 1.197     | 0.365    | 0.49  | 6.2e-01 |
| StudyP2008:Woman | 0.14672  | 1.158     | 0.363    | 0.40  | 6.9e-01 |
| Woman:Zinc       | 0.20328  | 1.225     | 0.294    | 0.69  | 4.9e-01 |

Random effects

| Group Variable | Std Dev | Variance |
|----------------|---------|----------|
| Study Zinc     | 0.2508  | 0.0629   |

```
> anova(zmeWoman, zmeWomanI)
```

Analysis of Deviance Table

Cox model: response is zincIPDsurv

Model 1: ~Study \* Woman + Zinc + Woman + (Zinc - 1 | Study)

Model 2: ~Study \* Woman + Zinc \* Woman + (Zinc - 1 | Study)

|   | loglik | Chisq | Df | P(> Chi ) |
|---|--------|-------|----|-----------|
| 1 | -833   |       |    |           |
| 2 | -832   | 0.47  | 1  | 0.49      |

```
> confint_Woman<-c(1.08123-1.96*0.24567, 1.08123+1.96*0.24567)
```

```
> exp(confint_Woman)
```

```
[1] 1.82 4.77
```

```
> confint_WI<-c(0.203-1.96*0.2937, 0.203+1.96*0.2937)
```

```
> exp(confint_WI)
```

```
[1] 0.689 2.179
```

**Table 3 analyses: Effect zinc acetate lozenges, effect modification by age as a continuous variable.**

Table 3 of the main text shows the analysis by age dichotomized at the median of 27 years. Age was also analyzed as a continuous variable, so that the null point of age was set at 31.2 years which is mean age, since then the baseline zinc effect RR corresponds to the effect on patients of mean age. In addition, age was measured in 10 year period since then the coefficient is more practical.

Below, zinc effect RR = 2.99 indicates the effect of zinc lozenges on common cold recovery rate in patients aged 31.2 years (ie when Age10Mean =0).

The interaction between age and zinc, RR=1.19 indicates that patients with the age of:

41.2 years have an estimated effect of RR = 3.56 = 2.99\*1.19

21.2 years have an estimated effect of RR = 2.51 = 2.99/1.19

However the 95%CI of the interaction between age and zinc is wide and the Analysis of Deviance Table indicates that the inclusion of the interaction between age and zinc does not improve the model, P = 0.21.

```
> zmeAg <- coxme(zincIPDsurv ~ Study*Age10Mean + Zinc+Age10Mean + (Zinc-1|Study), ties = "efron")
> zmeAgI <- coxme(zincIPDsurv ~ Study*Age10Mean + Zinc*Age10Mean + (Zinc-1|Study), ties = "efron")
> zmeAgI
```

```
Cox mixed-effects model fit by maximum likelihood
events, n = 199, 199
Iterations= 5 27
```

```
NULL Integrated Fitted
Log-likelihood -857.9 -830.4 -830.3
```

|                   | Chisq | df   | p         | AIC   | BIC   |
|-------------------|-------|------|-----------|-------|-------|
| Integrated loglik | 55.14 | 8.00 | 4.144e-09 | 39.14 | 12.79 |
| Penalized loglik  | 55.18 | 7.01 | 1.384e-09 | 41.17 | 18.09 |

```
Model: zincIPDsurv ~ Study * Age10Mean + Zinc * Age10Mean + (Zinc - 1 | Study)
Fixed coefficients
```

|                      | coef    | exp(coef) | se(coef) | z     | p       |
|----------------------|---------|-----------|----------|-------|---------|
| StudyP2000           | 0.4556  | 1.5771    | 0.2097   | 2.17  | 3.0e-02 |
| StudyP2008           | 0.6575  | 1.9299    | 0.2023   | 3.25  | 1.2e-03 |
| Age10Mean            | -0.1532 | 0.8579    | 0.1378   | -1.11 | 2.7e-01 |
| Zinc                 | 1.0955  | 2.9906    | 0.1593   | 6.88  | 6.1e-12 |
| StudyP2000:Age10Mean | -0.1502 | 0.8605    | 0.1760   | -0.85 | 3.9e-01 |
| StudyP2008:Age10Mean | 0.1102  | 1.1165    | 0.1546   | 0.71  | 4.8e-01 |
| Age10Mean:Zinc       | 0.1762  | 1.1927    | 0.1227   | 1.44  | 1.5e-01 |

Random effects

| Group Variable | Std Dev   | Variance  |
|----------------|-----------|-----------|
| Study Zinc     | 0.0171525 | 0.0002942 |

```
> anova(zmeAg, zmeAgI)
```

Analysis of Deviance Table

Cox model: response is zincIPDsurv

Model 1: ~Study \* Age10Mean + Zinc + Age10Mean + (Zinc - 1 | Study)

Model 2: ~Study \* Age10Mean + Zinc \* Age10Mean + (Zinc - 1 | Study)

|   | loglik | Chisq | Df | P(> Chi ) |
|---|--------|-------|----|-----------|
| 1 | -831   |       |    |           |
| 2 | -830   | 1.58  | 1  | 0.21      |

```
> confint_zmeAgI<-c(0.1762-1.96*0.1227, 0.1762+1.96*0.1227, 0.176)
```

```
> exp(confint_zmeAgI)
```

```
[1] 0.9377 1.5169 1.1924
```

**Table S1.** Difference in zinc acetate lozenge efficacy between subgroups: Calculation of the ratio of RRs between the subgroups (RRR). Compare this table with Table 3 in the main text.

| Subgroup                                        | No. common cold patients | Difference in the subgroup effects |             |                         |
|-------------------------------------------------|--------------------------|------------------------------------|-------------|-------------------------|
|                                                 |                          | RRR *                              | 95% CI      | Test of interaction (P) |
| Age (yr)                                        |                          |                                    |             |                         |
| 17-27                                           | 100                      | ref.                               |             | 0.15                    |
| 28-61                                           | 99                       | 1.6                                | 0.9-2.9     |                         |
| Sex                                             |                          |                                    |             |                         |
| Male                                            | 82                       | ref.                               |             | 0.5                     |
| Female                                          | 117                      | 0.816                              | 0.459-1.452 |                         |
| Ethnic group **                                 |                          |                                    |             |                         |
| White                                           | 132                      | ref.                               |             | 0.4                     |
| Black                                           | 47                       | 1.3                                | 0.6-2.7     |                         |
| Allergy                                         |                          |                                    |             |                         |
| No                                              | 137                      | ref.                               |             | 0.5                     |
| Yes                                             | 62                       | 1.2                                | 0.6-2.3     |                         |
| Smoker                                          |                          |                                    |             |                         |
| No                                              | 70                       | ref.                               |             | 0.8                     |
| Yes                                             | 28                       | 1.1                                | 0.4-2.8     |                         |
| Severity of the common cold at the baseline *** |                          |                                    |             |                         |
| Below the median                                | 102                      | ref.                               |             | 0.2                     |
| Above the median                                | 97                       | 0.69                               | 0.4-1.2     |                         |

\* The RRR estimate of subgroup difference is the ratio of the RRs between the 2 compared subgroups. For example, the RRR = 0.816 indicates that the RR estimate of the zinc acetate lozenge effect in females is 18.4% lower compared with the RR estimate of the zinc lozenge effect in males, see pp. 10-11.

**Table S2.** Effect of zinc lozenges on recovery rate by age subgroups within the 3 trials

Since the age ranges of the Prasad and Petrus studies differed substantially, and the average RR of the studies differed substantially, the interaction between age and zinc effect was calculated also within each of the 3 trials so that age was dichotomized by the median.

In each study, older participants had on average greater benefit of zinc acetate lozenges, but the difference over age was not significant. Although the direction was consistent, there was no significant age interaction when all trials were analyzed together (Table 3 and Table S1).

| Study                | No. common cold patients | Effects in subgroups |          |                         |
|----------------------|--------------------------|----------------------|----------|-------------------------|
|                      |                          | RRR                  | 95% CI   | Test of interaction (P) |
| <b>Petrus (1998)</b> |                          |                      |          |                         |
| Age (yr)             |                          |                      |          |                         |
| 18-22                | 51                       | ref.                 |          | 0.8                     |
| 23-54                | 50                       | 1.1                  | 0.50-2.5 |                         |
|                      |                          |                      |          |                         |
| <b>Prasad (2000)</b> |                          |                      |          |                         |
| Age (yr)             |                          |                      |          |                         |
| 18-37                | 25                       | ref.                 |          | 0.3                     |
| 38-61                | 23                       | 2.0                  | 0.6-6.6  |                         |
|                      |                          |                      |          |                         |
| <b>Prasad (2008)</b> |                          |                      |          |                         |
| Age (yr)             |                          |                      |          |                         |
| 17-34                | 25                       | ref.                 |          | 0.6                     |
| 35-60                | 25                       | 1.4                  | 0.4-4.4  |                         |

### Three zinc gluconate lozenge trials:

#### References to the two zinc gluconate trials with survival data available:

##### Eby (1984)

<http://dx.doi.org/10.1128/AAC.25.1.20>

<https://www.ncbi.nlm.nih.gov/pubmed/6367635>

##### Mossad (1996)

<http://dx.doi.org/10.7326/0003-4819-125-2-199607150-00001>

<https://www.ncbi.nlm.nih.gov/pubmed/8678384>

The extraction of data and the generation of data set for the survival analysis is described in: Hemilä (2011)[2]: Supplementary material 3, which is available at:

<http://www.ncbi.nlm.nih.gov/pmc/articles/PMC3136969>

[http://www.ncbi.nlm.nih.gov/pmc/articles/PMC3136969/bin/TORMJ-5-51\\_SD1.zip](http://www.ncbi.nlm.nih.gov/pmc/articles/PMC3136969/bin/TORMJ-5-51_SD1.zip)

Small later modifications were done for the Mossad (1996) data set to reach slightly closer fit between the data set and the published survival curves.

#### A third zinc gluconate trial did not publish survival data.

##### Godfrey (1972)

<http://imr.sagepub.com/content/20/3/234>

<http://dx.doi.org/10.1177/030006059202000305>

Nevertheless, survival of the zinc group could be inferred from Figure 1 of the Godfrey (1992) report.

Furthermore, the number of patients cured by day 7 was reported on p. 237.

“At day 7, five of the 35 ZGG-treated patients had a total of 15 symptoms, whereas 17 of the 38 placebo-treated patients had a total of 45 symptoms.”

This corresponds to 30 zinc gluconate participants of 35 having recovered and 21 placebo participants of 38 having recovered.

Calculation of the RR and the survival curve of the zinc group are shown on p. 19.

## Calculation of RR and NNT for the Eby (1984) and Mossad (1996) trials

### Eby (1984)

```
> EbyCox.efron <- coxph(EbyCox ~ Eby$Zinc, method = "efron")
> EbyCox.efron
```

Call:

```
coxph(formula = EbyCox ~ Eby$Zinc, method = "efron")
```

```
      coef exp(coef) se(coef)      z      p
Eby$Zinc 1.246      3.476    0.335  3.72 2e-04
```

Likelihood ratio test=15.5 on 1 df, **p=8.1e-05**

n= 65, number of events= 45

```
> exp(confint(EbyCox.efron))
```

```
      2.5 % 97.5 %
Eby$Zinc  1.80  6.70
```

```
> KM_Eby <- survfit(EbyCox ~ Eby$Zinc)
```

```
> summary(KM_Eby)
```

Call: survfit(formula = EbyCox ~ Eby\$Zinc)

```
      Eby$Zinc=0
time n.risk n.event survival std.err lower 95% CI upper 95% CI
  2     28      2   0.929  0.0487   0.838   1.000
  3     26      3   0.821  0.0724   0.691   0.976
  4     23      1   0.786  0.0775   0.648   0.953
  5     22      2   0.714  0.0854   0.565   0.903
  6     20      1   0.679  0.0883   0.526   0.876
  7     19      4   0.536  0.0942   0.379   0.756
```

```
      Eby$Zinc=1
time n.risk n.event survival std.err lower 95% CI upper 95% CI
  0.5    37      4   0.892  0.0510   0.7972   0.998
  1.0    33      4   0.784  0.0677   0.6618   0.928
  2.0    29      6   0.622  0.0797   0.4834   0.799
  3.0    23      3   0.541  0.0819   0.4016   0.728
  4.0    20      7   0.351  0.0785   0.2268   0.544
  5.0    13      2   0.297  0.0751   0.1812   0.488
  6.0    11      4   0.189  0.0644   0.0971   0.369
  7.0     7      2   0.135  0.0562   0.0598   0.305
```

### Calculation of the NNT for the Eby (1984) trial

| Day | Proportion of patients still sick on the given day |         |            | NNT |
|-----|----------------------------------------------------|---------|------------|-----|
|     | Zinc                                               | Placebo | Difference |     |
| 4   | 0.351                                              | 0.786   | 0.435      | 2.3 |
| 5   | 0.297                                              | 0.714   | 0.417      | 2.4 |
| 6   | 0.189                                              | 0.679   | 0.490      | 2.0 |

NNT, the number of patients needed to be treated for one patient to become cured by the given day.



## Mossad (1996)

```
> MossadCox.efron <- coxph(MossadCox ~ Mossad$Zinc, method = "efron")
> MossadCox.efron
```

Call:

```
coxph(formula = MossadCox ~ Mossad$Zinc, method = "efron")
```

```
             coef exp(coef) se(coef)      z      p
Mossad$Zinc 1.039      2.827    0.239  4.35 1.3e-05
```

Likelihood ratio test=19.5 on 1 df, **p=9.87e-06**

n= 99, number of events= 90

```
> exp(confint(MossadCox.efron))
```

```
             2.5 % 97.5 %
Mossad$Zinc  1.77  4.51
```

```
> KM_Mossad <- survfit(MossadCox ~ Mossad$Zinc)
```

```
> summary(KM_Mossad)
```

Call: survfit(formula = MossadCox ~ Mossad\$Zinc)

```

              Mossad$Zinc=0
time n.risk n.event survival std.err lower 95% CI upper 95% CI
  2     50      4   0.9200  0.0384   0.8478   0.998
  3     46      3   0.8600  0.0491   0.7690   0.962
  4     43      5   0.7600  0.0604   0.6504   0.888
  5     38      2   0.7200  0.0635   0.6057   0.856
  6     36      5   0.6200  0.0686   0.4991   0.770
  7     31      3   0.5600  0.0702   0.4380   0.716
  8     26      5   0.4523  0.0713   0.3320   0.616
```

```

              Mossad$Zinc=1
time n.risk n.event survival std.err lower 95% CI upper 95% CI
  1     49      4   0.9184  0.0391   0.8448   0.998
  2     45      5   0.8163  0.0553   0.7148   0.932
  3     40      6   0.6939  0.0658   0.5761   0.836
  4     34      8   0.5306  0.0713   0.4078   0.690
  5     26      4   0.4490  0.0711   0.3292   0.612
  6     22      6   0.3265  0.0670   0.2184   0.488
  7     16      7   0.1837  0.0553   0.1018   0.331
  8      9      3   0.1224  0.0468   0.0579   0.259
```

## Calculation of the NNT for the Mossad (1996) trial

| Day | Proportion of patients still sick on the given day |         |            | NNT |
|-----|----------------------------------------------------|---------|------------|-----|
|     | Zinc                                               | Placebo | Difference |     |
| 4   | 0.531                                              | 0.760   | 0.229      | 4.4 |
| 5   | 0.449                                              | 0.720   | 0.271      | 3.7 |
| 6   | 0.326                                              | 0.620   | 0.294      | 3.4 |
| 7   | 0.184                                              | 0.560   | 0.376      | 2.7 |
| 8   | 0.122                                              | 0.452   | 0.330      | 3.0 |

NNT, the number of patients needed to be treated for one patient to become cured by the given day.

## Kaplan-Meier curves for the Eby (1984) and Mossad (1996) trials

In the Eby (1984) trial, 20 observations were censored, out of 65 patients, and in the Mossad (1996) trial, 8 observations were censored, out of 100 patients. Censored observations are marked by the + mark.

### Eby (1984)

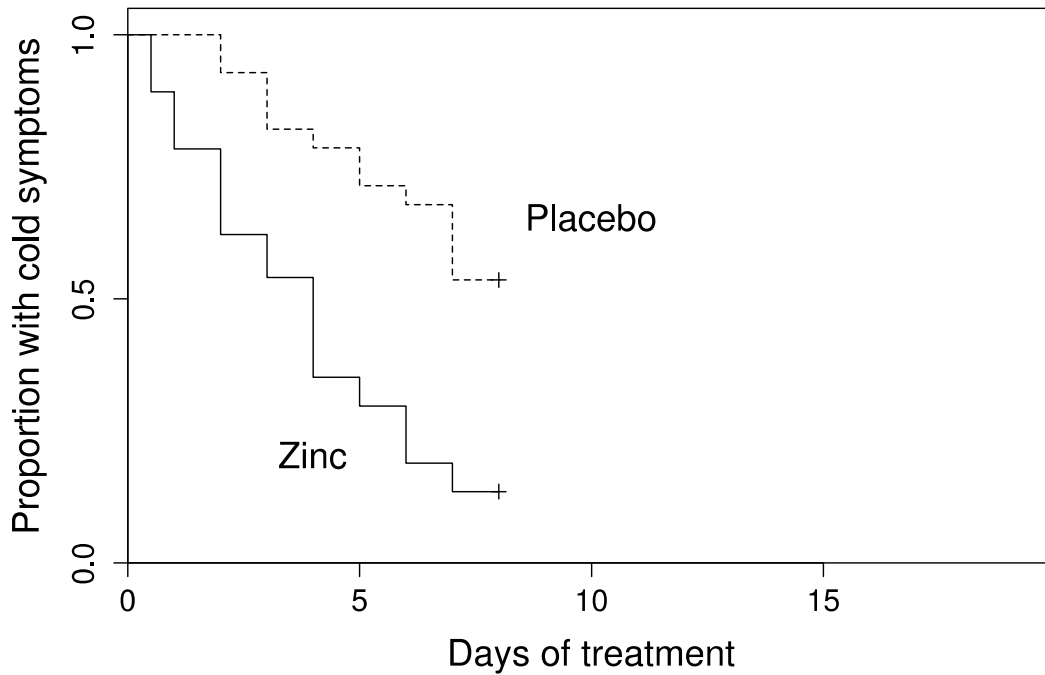

### Mossad (1996)

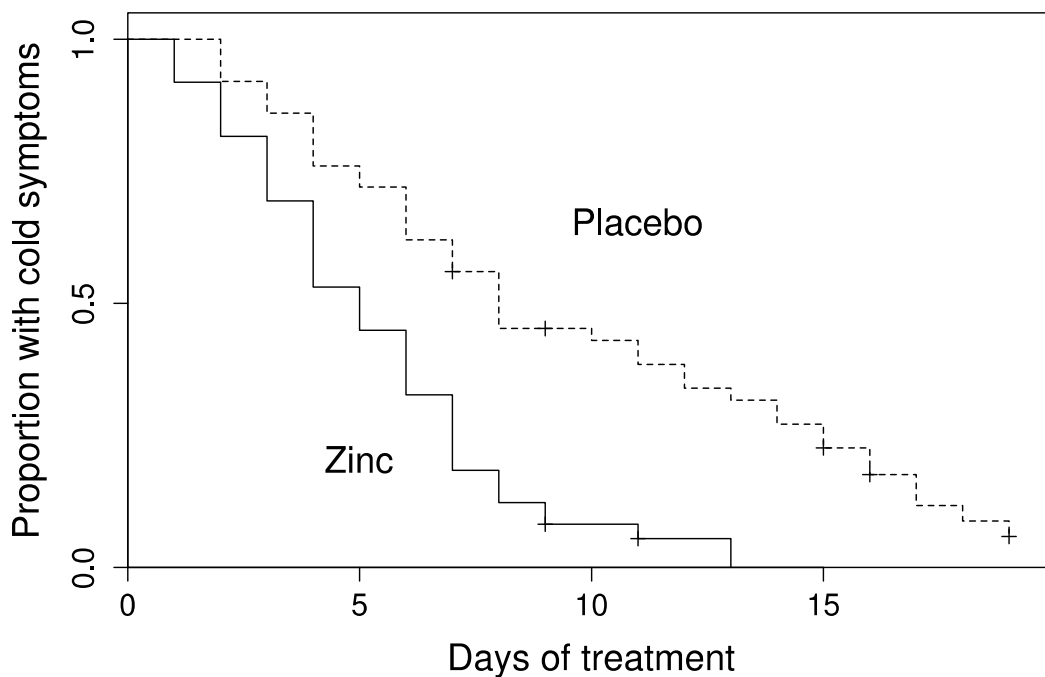

## Calculation of RR and NNT for day 7 of the Godfrey (1992) trial

```
> riskratio(Godfrey_day7, rev="c")
$data
      Outcome
Treatment Still cold Cured Total
Placebo      17     21    38
Zinc         5     30    35
Total        22     51    73

$measure
      risk ratio with 95% C.I.
Treatment estimate lower upper
Placebo      1.000     NA     NA
Zinc         1.551  1.1303  2.1283

$p.value
      two-sided
Treatment midp.exact fisher.exact chi.square
Placebo      NA     NA     NA
Zinc         0.0052124  0.0054615  0.0046163
```

NNT:

```
> NNT <- (1/(30/35 - 21/38))
> NNT
[1] 3.284
```

The data points for day 7 were reported (p. 237) and the zinc group survival curve could be calculated from Godfrey's Fig. 1.

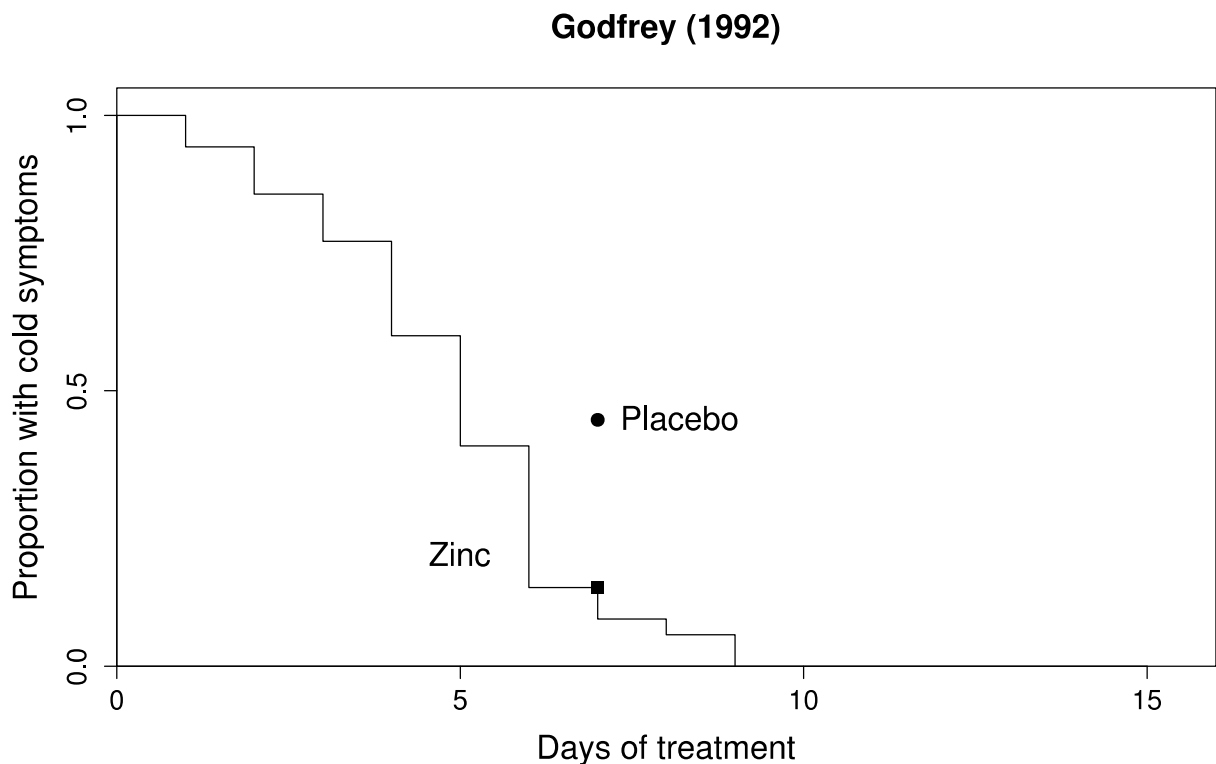

**The following two pages show the data set that was analyzed in the study**

Most of the variables are evident.

The definition of severity is described in Supplementary file 1 and the continuous scale was transformed to binary outcome “SeveBin” at the medians of the three studies.

“Duration” indicates the duration of common cold episodes

“Study” variable indicates the studies, so that Petrus indicates the Petrus (1998) study [10], P2000 indicates the Prasad (2000) study [11], and P2008 indicates the Prasad (2008) study [12].

“NA” indicates not available.

The data set can be copy pasted as a CSV file eg to a spreadsheet program.

"" , "ID" , "Age" , "Black" , "Sex" , "Allergy" , "Smoker" , "Severity" , "SeveBin" , "Zinc" , "Duration" , "Cured" , "Study"  
"1" , 103, 21, NA, 0, 0, NA, 10, 1, 1, 8, 1, "Petrus"  
"2" , 105, 18, 0, 0, 1, NA, 2, 0, 1, 3, 1, "Petrus"  
"3" , 106, 40, 1, 1, 0, NA, 7, 0, 1, 4, 1, "Petrus"  
"4" , 107, 37, 0, 0, 1, NA, 7, 0, 1, 7, 1, "Petrus"  
"5" , 109, 42, 0, 1, 0, NA, 4, 0, 1, 6, 1, "Petrus"  
"6" , 111, 21, 0, 1, 0, NA, 7, 0, 1, 4, 1, "Petrus"  
"7" , 115, 22, 0, 0, 1, NA, 7, 0, 1, 7, 1, "Petrus"  
"8" , 119, 21, 0, 1, 0, NA, 6, 0, 1, 5, 1, "Petrus"  
"9" , 121, 22, 0, 0, 1, NA, 12, 1, 1, 7, 1, "Petrus"  
"10" , 122, 20, 0, 1, 1, NA, 8, 1, 1, 6, 1, "Petrus"  
"11" , 123, 30, 0, 1, 0, NA, 2, 0, 1, 2, 1, "Petrus"  
"12" , 125, 22, 0, 1, 0, NA, 7, 0, 1, 8, 1, "Petrus"  
"13" , 127, 22, 0, 0, 1, NA, 5, 0, 1, 12, 1, "Petrus"  
"14" , 128, 20, 0, 0, 1, NA, 14, 1, 1, 4, 1, "Petrus"  
"15" , 129, 22, 0, 0, 1, NA, 12, 1, 1, 7, 1, "Petrus"  
"16" , 132, 25, 1, 1, 0, NA, 5, 0, 1, 4, 1, "Petrus"  
"17" , 133, 20, 0, 0, 0, NA, 4, 0, 1, 2, 1, "Petrus"  
"18" , 137, 24, 0, 0, 1, NA, 8, 1, 1, 5, 1, "Petrus"  
"19" , 139, 24, 1, 1, 0, NA, 10, 1, 1, 5, 1, "Petrus"  
"20" , 141, 23, 1, 1, 0, NA, 5, 0, 1, 4, 1, "Petrus"  
"21" , 142, 19, NA, 0, 0, NA, 2, 0, 1, 7, 1, "Petrus"  
"22" , 144, 47, 0, 1, 0, NA, 4, 0, 1, 11, 1, "Petrus"  
"23" , 145, 35, 1, 1, 1, NA, 14, 1, 1, 3, 1, "Petrus"  
"24" , 146, 20, 0, 0, 1, NA, 7, 0, 1, 6, 1, "Petrus"  
"25" , 147, 20, 0, 0, 1, NA, 5, 0, 1, 3, 1, "Petrus"  
"26" , 148, 22, 0, 1, 0, NA, 6, 0, 1, 4, 1, "Petrus"  
"27" , 151, 43, NA, 1, 0, NA, 2, 0, 1, 4, 1, "Petrus"  
"28" , 153, 22, 0, 0, 1, NA, 3, 0, 1, 7, 1, "Petrus"  
"29" , 155, 21, 0, 0, 1, NA, 8, 1, 1, 2, 1, "Petrus"  
"30" , 158, 20, 0, 0, 0, NA, 6, 0, 1, 3, 1, "Petrus"  
"31" , 159, 50, 1, 1, 0, NA, 12, 1, 1, 6, 1, "Petrus"  
"32" , 161, 21, 0, 1, 0, NA, 8, 1, 1, 8, 1, "Petrus"  
"33" , 163, 41, 1, 1, 0, NA, 9, 1, 1, 6, 1, "Petrus"  
"34" , 165, 31, 1, 1, 0, NA, 12, 1, 1, 6, 1, "Petrus"  
"35" , 166, 24, 0, 1, 1, NA, 7, 0, 1, 3, 1, "Petrus"  
"36" , 167, 21, 1, 0, 0, NA, 6, 0, 1, 3, 1, "Petrus"  
"37" , 168, 28, NA, 0, 1, NA, 9, 1, 1, 8, 1, "Petrus"  
"38" , 170, 19, NA, 0, 0, NA, 9, 1, 1, 3, 1, "Petrus"  
"39" , 171, 36, 0, 1, 0, NA, 12, 1, 1, 9, 1, "Petrus"  
"40" , 174, 41, NA, 1, 1, NA, 4, 0, 1, 3, 1, "Petrus"  
"41" , 178, 21, 0, 0, 1, NA, 3, 0, 1, 4, 1, "Petrus"  
"42" , 180, 39, 0, 0, 0, NA, 7, 0, 1, 2, 1, "Petrus"  
"43" , 181, 20, 0, 1, 0, NA, 6, 0, 1, 4, 1, "Petrus"  
"44" , 184, 20, 0, 1, 0, NA, 5, 0, 1, 2, 1, "Petrus"  
"45" , 185, 29, 0, 1, 1, NA, 7, 0, 1, 3, 1, "Petrus"  
"46" , 191, 23, 0, 0, 1, NA, 8, 1, 1, 8, 1, "Petrus"  
"47" , 192, 20, 0, 1, 0, NA, 10, 1, 1, 10, 1, "Petrus"  
"48" , 194, 23, 0, 1, 0, NA, 11, 1, 1, 5, 1, "Petrus"  
"49" , 196, 21, 0, 1, 0, NA, 8, 1, 1, 11, 1, "Petrus"  
"50" , 198, 22, 0, 0, 1, NA, 9, 1, 1, 6, 1, "Petrus"  
"51" , 199, 21, 0, 0, 1, NA, 5, 0, 1, 3, 1, "Petrus"  
"52" , 201, 50, 0, 0, 1, NA, 5, 0, 1, 2, 1, "Petrus"  
"53" , 101, 23, 1, 1, 1, NA, 20, 1, 0, 2, 1, "Petrus"  
"54" , 102, 54, 0, 0, 1, NA, 10, 1, 0, 2, 1, "Petrus"  
"55" , 104, 18, 0, 0, 0, NA, 14, 1, 0, 7, 1, "Petrus"  
"56" , 108, 18, NA, 1, 1, NA, 6, 0, 0, 7, 1, "Petrus"  
"57" , 110, 21, 0, 0, 1, NA, 6, 0, 0, 14, 1, "Petrus"  
"58" , 112, 21, 0, 1, 0, NA, 15, 1, 0, 5, 1, "Petrus"  
"59" , 113, 21, 0, 0, 0, NA, 5, 0, 0, 4, 1, "Petrus"  
"60" , 114, 28, 0, 1, 1, NA, 10, 1, 0, 11, 1, "Petrus"  
"61" , 116, 42, 0, 1, 0, NA, 7, 0, 0, 8, 1, "Petrus"  
"62" , 117, 21, 0, 1, 1, NA, 10, 1, 0, 3, 1, "Petrus"  
"63" , 118, 22, 0, 1, 0, NA, 9, 1, 0, 7, 1, "Petrus"  
"64" , 120, 29, 0, 1, 0, NA, 9, 1, 0, 4, 1, "Petrus"  
"65" , 124, 22, 0, 1, 0, NA, 4, 0, 0, 4, 1, "Petrus"  
"66" , 126, 52, 0, 0, 0, NA, 10, 1, 0, 13, 1, "Petrus"  
"67" , 130, 22, NA, 0, 0, NA, 10, 1, 0, 4, 1, "Petrus"  
"68" , 131, 24, 0, 0, 0, NA, 9, 1, 0, 6, 1, "Petrus"  
"69" , 134, 21, 1, 1, 1, NA, 7, 0, 0, 13, 1, "Petrus"  
"70" , 135, 36, 1, 0, 1, NA, 5, 0, 0, 5, 1, "Petrus"  
"71" , 136, 50, 0, 1, 0, NA, 6, 0, 0, 5, 1, "Petrus"  
"72" , 138, 23, 0, 0, 1, NA, 4, 0, 0, 7, 1, "Petrus"  
"73" , 140, 30, 0, 1, 1, NA, 13, 1, 0, 15, 1, "Petrus"  
"74" , 143, 37, NA, 1, 0, NA, 4, 0, 0, 15, 1, "Petrus"  
"75" , 149, 24, 1, 0, 1, NA, 7, 0, 0, 8, 1, "Petrus"  
"76" , 150, 24, 0, 1, 0, NA, 12, 1, 0, 11, 1, "Petrus"  
"77" , 152, 29, 1, 0, 1, NA, 3, 0, 0, 4, 1, "Petrus"  
"78" , 154, 34, NA, 1, 0, NA, 13, 1, 0, 5, 1, "Petrus"  
"79" , 156, 24, 0, 0, 0, NA, 7, 0, 0, 6, 1, "Petrus"  
"80" , 157, 25, 0, 1, 0, NA, 10, 1, 0, 3, 1, "Petrus"  
"81" , 160, 20, 0, 1, 1, NA, 14, 1, 0, 4, 1, "Petrus"  
"82" , 162, 36, NA, 1, 1, NA, 6, 0, 0, 10, 1, "Petrus"  
"83" , 164, 23, 1, 1, 1, NA, 6, 0, 0, 4, 1, "Petrus"  
"84" , 169, 19, 0, 1, 0, NA, 6, 0, 0, 7, 1, "Petrus"  
"85" , 172, 27, 0, 0, 1, NA, 11, 1, 0, 12, 1, "Petrus"  
"86" , 173, 31, 0, 1, 1, NA, 16, 1, 0, 8, 1, "Petrus"  
"87" , 175, 18, 0, 0, 1, NA, 7, 0, 0, 14, 1, "Petrus"  
"88" , 176, 22, 0, 0, 0, NA, 7, 0, 0, 6, 1, "Petrus"  
"89" , 177, 27, 0, 0, 0, NA, 7, 0, 0, 2, 1, "Petrus"  
"90" , 179, 32, 0, 0, 0, NA, 3, 0, 0, 7, 1, "Petrus"  
"91" , 182, 21, 0, 1, 1, NA, 4, 0, 0, 5, 1, "Petrus"  
"92" , 183, 21, NA, 0, 0, NA, 4, 0, 0, 6, 1, "Petrus"  
"93" , 186, 18, 0, 1, 0, NA, 5, 0, 0, 3, 1, "Petrus"  
"94" , 187, 18, 0, 1, 1, NA, 2, 0, 0, 4, 1, "Petrus"  
"95" , 188, 26, 0, 1, 0, NA, 18, 1, 0, 4, 1, "Petrus"  
"96" , 189, 18, 0, 1, 0, NA, 17, 1, 0, 5, 1, "Petrus"  
"97" , 190, 20, 0, 0, 0, NA, 5, 0, 0, 15, 1, "Petrus"  
"98" , 195, 20, 0, 0, 0, NA, 7, 0, 0, 6, 1, "Petrus"  
"99" , 197, 21, 0, 0, 1, NA, 23, 1, 0, 15, 1, "Petrus"

"100",200,28,0,1,1,NA,13,1,0,5,1,"Petrus"  
"101",202,28,NA,0,1,NA,8,1,0,6,1,"Petrus"  
"102",801,22,0,1,0,0,9,1,1,6,1,"P2008"  
"103",802,32,1,1,0,1,12,1,1,4,1,"P2008"  
"104",803,49,1,0,0,1,8,1,1,2,1,"P2008"  
"105",804,37,1,1,0,1,14,1,1,3,1,"P2008"  
"106",805,49,1,0,1,1,17,1,1,5,1,"P2008"  
"107",806,29,0,1,0,0,20,1,1,4,1,"P2008"  
"108",807,26,NA,1,0,0,4,0,1,5,1,"P2008"  
"109",808,22,0,1,0,0,7,0,1,4,1,"P2008"  
"110",809,19,0,1,0,0,6,0,1,3,1,"P2008"  
"111",810,38,0,0,0,0,9,1,1,3,1,"P2008"  
"112",811,19,0,1,0,0,8,1,1,5,1,"P2008"  
"113",812,18,0,1,0,0,6,0,1,4,1,"P2008"  
"114",813,20,0,1,0,1,9,1,1,3,1,"P2008"  
"115",814,25,1,1,0,0,11,1,1,4,1,"P2008"  
"116",815,56,0,1,1,0,9,1,1,4,1,"P2008"  
"117",816,59,1,1,1,0,4,0,1,2,1,"P2008"  
"118",817,26,0,0,0,0,7,0,1,5,1,"P2008"  
"119",818,23,1,1,1,0,4,0,1,5,1,"P2008"  
"120",819,39,NA,0,0,0,11,1,1,4,1,"P2008"  
"121",820,18,0,1,0,0,14,1,1,5,1,"P2008"  
"122",821,50,1,1,0,0,5,0,1,4,1,"P2008"  
"123",822,46,0,1,1,0,2,0,1,3,1,"P2008"  
"124",823,50,0,1,1,0,10,1,1,5,1,"P2008"  
"125",824,31,0,0,0,0,5,0,1,3,1,"P2008"  
"126",825,60,0,0,0,1,8,1,1,5,1,"P2008"  
"127",826,27,0,1,1,0,8,1,0,7,1,"P2008"  
"128",827,29,NA,1,1,0,11,1,0,9,1,"P2008"  
"129",828,50,0,0,0,1,3,0,0,7,1,"P2008"  
"130",829,45,1,1,1,1,15,1,0,7,1,"P2008"  
"131",830,23,0,0,0,0,19,1,0,6,1,"P2008"  
"132",831,42,1,0,1,1,8,1,0,8,1,"P2008"  
"133",832,48,1,0,0,1,7,0,0,6,1,"P2008"  
"134",833,19,0,1,0,0,13,1,0,7,1,"P2008"  
"135",834,56,1,1,0,0,8,1,0,8,1,"P2008"  
"136",835,23,0,1,0,0,6,0,0,6,1,"P2008"  
"137",836,21,0,1,0,1,6,0,0,8,1,"P2008"  
"138",837,20,0,0,0,0,8,1,0,10,1,"P2008"  
"139",838,40,0,1,0,0,6,0,0,7,1,"P2008"  
"140",839,45,1,1,0,1,4,0,0,4,1,"P2008"  
"141",840,53,1,0,0,1,6,0,0,8,1,"P2008"  
"142",841,47,0,1,0,0,5,0,0,9,1,"P2008"  
"143",842,39,NA,0,0,0,8,1,0,7,1,"P2008"  
"144",843,50,0,1,0,0,4,0,0,7,1,"P2008"  
"145",844,19,0,0,0,0,9,1,0,5,1,"P2008"  
"146",845,51,1,0,0,0,4,0,0,7,1,"P2008"  
"147",846,46,0,1,0,1,14,1,0,7,1,"P2008"  
"148",847,17,0,1,0,0,3,0,0,8,1,"P2008"  
"149",848,20,0,1,0,0,5,0,0,7,1,"P2008"  
"150",849,22,1,1,0,0,9,1,0,6,1,"P2008"  
"151",850,45,0,0,0,1,8,1,0,7,1,"P2008"  
"152",301,42,0,1,0,0,5,0,1,4,1,"P2000"  
"153",302,27,0,1,1,1,13,1,1,3,1,"P2000"  
"154",303,59,0,1,0,0,7,0,1,3,1,"P2000"  
"155",304,43,1,1,0,1,14,1,1,7,1,"P2000"  
"156",305,23,0,1,0,0,9,0,1,5,1,"P2000"  
"157",306,40,1,0,0,1,13,1,1,5,1,"P2000"  
"158",307,61,0,1,0,0,14,1,1,6,1,"P2000"  
"159",308,25,1,1,0,0,12,1,1,3,1,"P2000"  
"160",309,41,0,1,0,0,3,0,1,3,1,"P2000"  
"161",310,19,0,1,0,1,6,0,1,3,1,"P2000"  
"162",311,42,0,1,0,0,12,1,1,2,1,"P2000"  
"163",312,59,1,1,0,0,18,1,1,7,1,"P2000"  
"164",313,28,0,0,0,0,5,0,1,6,1,"P2000"  
"165",314,38,0,1,0,0,10,0,1,6,1,"P2000"  
"166",315,24,0,0,0,0,6,0,1,4,1,"P2000"  
"167",316,36,0,1,1,0,13,1,1,8,1,"P2000"  
"168",317,32,0,0,0,0,2,0,1,5,1,"P2000"  
"169",318,33,0,1,0,0,26,1,1,2,1,"P2000"  
"170",319,34,0,0,0,0,11,1,1,4,1,"P2000"  
"171",320,31,NA,1,0,1,14,1,1,5,1,"P2000"  
"172",321,35,1,1,0,0,12,1,1,3,1,"P2000"  
"173",322,25,NA,0,0,0,13,1,1,5,1,"P2000"  
"174",323,38,0,1,0,0,11,1,1,6,1,"P2000"  
"175",324,33,0,1,0,0,11,1,1,4,1,"P2000"  
"176",325,43,0,0,0,0,11,1,1,3,1,"P2000"  
"177",326,42,0,1,1,0,6,0,0,10,1,"P2000"  
"178",327,29,0,0,1,1,6,0,0,8,1,"P2000"  
"179",328,40,1,0,0,1,11,1,0,9,1,"P2000"  
"180",329,32,0,1,0,0,11,1,0,9,1,"P2000"  
"181",330,42,1,0,0,1,6,0,0,7,1,"P2000"  
"182",331,54,1,1,0,0,11,1,0,12,1,"P2000"  
"183",332,22,1,1,0,0,14,1,0,9,1,"P2000"  
"184",333,37,1,0,0,1,10,0,0,7,1,"P2000"  
"185",334,29,0,1,0,0,6,0,0,5,1,"P2000"  
"186",335,52,1,0,0,1,11,1,0,12,1,"P2000"  
"187",336,24,0,0,0,0,15,1,0,6,1,"P2000"  
"188",337,56,1,1,1,1,11,1,0,9,1,"P2000"  
"189",338,43,1,0,0,0,6,0,0,7,1,"P2000"  
"190",339,54,1,0,0,1,9,0,0,8,1,"P2000"  
"191",340,18,0,0,1,0,6,0,0,8,1,"P2000"  
"192",341,38,0,1,0,0,6,0,0,8,1,"P2000"  
"193",342,42,0,0,0,0,8,0,0,9,1,"P2000"  
"194",343,33,1,1,0,0,11,1,0,6,1,"P2000"  
"195",344,40,1,0,0,1,7,0,0,8,1,"P2000"  
"196",345,52,0,1,0,0,3,0,0,8,1,"P2000"  
"197",346,31,NA,1,0,0,15,1,0,7,1,"P2000"  
"198",347,23,0,1,0,0,6,0,0,5,1,"P2000"  
"199",348,37,0,1,0,0,7,0,0,9,1,"P2000"
